## **Nav1.7 gating in human iPSC derived sensory neurons: an experimental and computational study**

Alberto Capurro<sup>1\*</sup>, Jack Thornton<sup>1</sup>, Bruno Cessac<sup>2</sup>, Lyle Armstrong<sup>1</sup>, Evelyne Sernagor<sup>1</sup>

1. Biosciences Institute, Faculty of Medical Sciences, Newcastle University, UK.

2. Université Côte d'Azur, Inria, Biovision team, France.

Short title:

Nav1.7 modulation in chronic pain

\* Corresponding author

E-mail: [alberto.capurro@newcastle.ac.uk](mailto:alberto.capurro@newcastle.ac.uk)

## 1 **Abstract**

2 Chronic pain is a global healthcare problem with a huge societal impact. Its management remains  
3 unsatisfactory, with no single treatment clinically approved in most cases. In this study we use an *in*  
4 *vitro* experimental model of erythromelalgia consisting of sensory neurons derived from human  
5 induced pluripotent stem cells obtained from a patient (carrying the mutation F1449V) and a control  
6 subject. We combine neurophysiology and computational modelling to focus on the Nav1.7 voltage  
7 gated sodium channel, which acts as an amplifier of the receptor potential in nociceptive neurons and  
8 plays a critical role in erythromelalgia due to gain of function mutations causing the channel to open  
9 with smaller depolarisations.

10 Using multi-electrode array (extracellular) recordings, we found that the scorpion toxin OD1 increases  
11 the excitability of sensory neurons in cultures obtained from the control donor, evidenced by  
12 increased spontaneous spike rate and amplitude. In erythromelalgia cultures, the application of the  
13 Nav1.7 blocker PF-05089771 effectively stopped spontaneous firing. These results, which are in  
14 accordance with current clamp and voltage clamp recordings reported in the literature, are explained  
15 with a conductance-based computational model of a single human nociceptive neuron. The disease  
16 was simulated through a decrease of the Nav1.7 half activation voltage, which decreased the rheobase  
17 and increased the response to supra threshold depolarizing currents. This enhanced response could  
18 be successfully suppressed by blocking the Nav1.7 channels. The painful effects of OD1 were simulated  
19 through a slower establishment and a quicker removal of Nav1.7 inactivation, reproducing the effects  
20 of the toxin on the spike frequency and amplitude. Our model simulations suggest that the increase  
21 in extracellular spike amplitude observed in the MEA after OD1 treatment can be due mainly to a slope  
22 increase in the ascending phase of the intracellular spike caused by impaired inactivation gating.

23

24

## 25 **Introduction**

26 Chronic pain is a global healthcare problem, particularly affecting elderly people, women and persons  
27 with lower socio-economic status (Van Hecke et al., 2013). It is one of the most common reasons for  
28 physician consultation in developed countries, interfering with quality of life and causing large socio-  
29 economic impacts that include significant loss of working hours and the need of clinical care. Current  
30 therapies have limitations in their effectiveness and side effects, creating an urgent need to develop  
31 more precise and effective treatments for pain management (Khouzam, 2000). In this study we focus  
32 on the voltage dependent properties of the sodium channel Nav1.7 that is implicated in inherited  
33 erythromelalgia, a rare chronic condition causing attacks of severe pain (e.g., McDonnell et al., 2016).

34 Pain evoked spiking activity starts in peripheral terminals of dorsal root ganglion (DRG) neurons. The  
35 central extensions of these neurons form the A $\delta$  and C fibres which establish glutamatergic synapses  
36 onto second order neurons within the spinal cord. They can be stimulated by mechanical, thermal or  
37 chemical stimuli as well as by inflammatory mediators. Distributed throughout the body (skin, viscera,  
38 muscles, joints, meninges), they carry noxious sensory information into the central nervous system  
39 (Serpell, 2006). The recent discovery of nociceptive Schwann cells has changed the notion of bare  
40 nerve terminals being the starting point of pain sensation, and introduced the concept of a glio-neural  
41 end organ in the skin that transmits nociceptive information to the nerve, resembling the specialized  
42 receptor cells found in other sensory systems (Abdo et al., 2019).

43 DRG neurons express several types of voltage gated sodium channels with different properties (Rush  
44 et al., 2007; Lera Ruiz and Kraus, 2015). The opening of Nav1.7 channels requires smaller  
45 depolarisations than other types of sodium channels, being more easily activated by the graded  
46 generator potentials. For this reason it is considered to be a threshold channel (Dib-Hajj et al., 2013)  
47 that acts as an amplifier of the receptor potential, increasing the probability of triggering a spike via  
48 the activation of other higher threshold sodium channels such as Nav1.8 (e.g., Renganathan, 2001;

49 Payne, et. al., 2015). This amplification property makes Nav1.7 a major contributor to pain signalling  
50 in humans.

51 Erythromelalgia is caused by gain-of-function mutations of the gene SCN9A, which encodes for the  
52 Nav1.7 channels (Dib-Hajj et al., 2005; McDonnell et al., 2016). Different types of mutations have in  
53 common the need for less depolarization to open the channel than in the wild type, resulting in a  
54 decrease of the rheobase (i.e., minimal amplitude of a depolarizing current of infinite duration that is  
55 able to evoke a spike). Neurons often fire spontaneously in erythromelalgia cultures, while control  
56 cells are silent unless receiving strong depolarizing currents (Cao et al., 2016).

57 In this study, we have used extracellular recordings of spontaneous activity in sensory neuronal  
58 cultures derived from human induced pluripotent stem cells (hiPSCs) obtained from an  
59 erythromelalgia patient and a control subject to study the voltage dependent gating properties of  
60 Nav1.7 channels. To start, the effects on the neuronal firing of two different pharmacological  
61 compounds -a pain eliciting scorpion toxin (OD1, Motin et al., 2016) and a potentially analgesic drug  
62 (PF-05089771, Cao et al., 2016)- were assessed in these cultures using multi electrode array (MEA)  
63 recordings. We then presented a simple conductance-based computational model of a single  
64 nociceptive neuron to explain our findings in terms of the Nav1.7 gating process.

## 65 **Materials and Methods**

### 66 **Cells and MEA recordings**

67 For this study we used hiPSCs from a control subject (cell line AD3) and an erythromelalgia patient  
68 (cell line RCi002-A, carrying the mutation F1449V) made available at the European Bank for induced  
69 pluripotent stem cells (EBiSC). The cells were differentiated into sensory neurons using a small  
70 molecule based protocol described previously (Cao et al., 2016, and references therein). Once they  
71 reached this stage, the cells were re-plated in 24 wells MEA plates (MEA700, Multichannel Systems,  
72 Reutlingen, Germany) where the spontaneous activity was recorded after 10 weeks of maturation.

73 Each well contains 12 circular electrodes (100  $\mu\text{m}$  diameter, 700  $\mu\text{m}$  electrode pitch), making a total  
74 of 288 electrodes per plate. The large distance between electrodes makes it very unlikely that the  
75 activity originating from an individual neuron will be detected by adjacent electrodes. On the other  
76 hand, due to the relatively large cell density in these cultures, which organize in structures called  
77 neural rosettes (e.g., Wilson and Stice, 2006), it is quite likely that one electrode can detect the activity  
78 of more than one neuron (up to four in our data sets, although most channels had only one or two).

79 We compared the spontaneous activity of sensory neurons obtained from a control subject (plated in  
80 18 wells, making a total of 216 electrodes in MEA 1) with an erythromelalgia patient (plated in 24  
81 wells, making a total of 288 electrodes in MEA 2). Each well constitutes an independent cell culture.

82 The cultures were treated with OD1 (100 nM) in the control subject (MEA 1) and with PF-05089771  
83 (100 nM) in the patient (MEA 2). The activity was recorded for 5 minutes immediately before the  
84 application of each substance and compared with a recording of the same duration performed 5  
85 minutes after the onset of drug exposure. Wells contained 200  $\mu\text{l}$  of growing medium and 5  $\mu\text{l}$  drops  
86 were added to apply the treatments. The experimental doses were selected to be in a near saturation  
87 range to ensure a strong effect, based on dose response curves published previously (Cao et al., 2016  
88 for PF-05089771; Motin et al., 2016 for OD1). Both compounds were purchased from Tocris (Bio-  
89 Techne, Abingdon, UK).

## 90 **Spike sorting and pairing of units**

91 Recordings were performed with the Multiwell-MEA-System and the software Multi Channel  
92 Experimenter (Multi Channel Systems, Reutlingen, Germany). Each channel was band-pass filtered  
93 (100 to 3500 Hz) and acquired with a sampling rate of 20 kHz.

94 The raw voltage traces were first plotted and inspected using a zoom tool to discard artefacts and  
95 confirm the existence of spikes. The voltage time series were then fed into the Matlab toolbox  
96 Waveclus (Quiñero et al., 2004) to perform spike sorting in all active channels. In the toolbox,

97 the continuous data were filtered again with a non-causal band pass filter between 300 and 3000 Hz  
98 and the firing times were detected with an amplitude threshold. We used a dual threshold (i.e., picking  
99 deflections in both up and down directions) set to 5 median absolute deviations of the filtered voltage  
100 signal with a refractory period of 2 ms to avoid double annotations due to fast voltage oscillations in  
101 the vicinity of the threshold. Spikes were aligned to their maximum, after interpolating the waveforms  
102 to locate the peak time more accurately. The toolbox uses a wavelet based method for feature  
103 extraction, and the grouping of spikes into clusters is done with super-paramagnetic clustering (Blatt  
104 et al., 1996), a stochastic algorithm that does not assume any particular distribution of the data. In  
105 few cases the dual threshold created mistakes in the detection, so we decided to use a single  
106 threshold, kept for the units that corresponded to the same neuron before and after a given  
107 treatment. We consider this spike sorting strategy as supervised, always following the criterion of the  
108 biologist as ground true. The firing times and voltage cut outs of all units were stored to document  
109 the parameters and quality of the spike sorting in each channel.

110 Units that were active both before and after each pharmacological treatment were identified. The  
111 only set-in-stone criterion for deciding if they are the same cell is the coordinates of the current  
112 sources, using high density MEAs (e.g., Hilgen et al., 2017). As our data were recorded with low density  
113 MEAs, we cannot provide this level of certainty, but assumed that they corresponded to the same  
114 neuron if the wave shape remained similar across recordings performed within few minutes of each  
115 other. Possible ambiguities were minimized by the fact that most channels yielded only one or two  
116 active neurons. These pairs were used to investigate the changes in spike frequency and amplitude  
117 caused by the pharmacological treatments (Figs 1 and 2). If we were reasonably convinced that a given  
118 unit corresponded to the same neuron before and after treatment, we designated the two recordings  
119 as a pair. In the case of the control cultures, few neurons had spontaneous discharges and most cells  
120 started to fire only after the OD1 treatment. Conversely, in the case of the patient cultures, several  
121 neurons were active before, but few remained active after the application of PF-05089771.

122 For statistical comparisons between two conditions we used the Wilcoxon signed rank test (for paired  
123 values) or the Mann–Whitney U test (for unpaired values). We also used cross correlation histograms  
124 of the spike times recorded from the same channel to assess whether neurons tend to fire at fixed  
125 delay from another.

## 126 **Numerical simulations**

127 We performed numerical simulations of the membrane potential and sodium channels gate  
128 parameters of a single nociceptive neuron using the software NEURON ([www.neuron.yale.edu](http://www.neuron.yale.edu)) and  
129 the Channel Builder GUI (McDougal et al., 2017). Following previous models of DRG neurons (Kovalsky  
130 et al., 2009; Choi and Waxman, 2011; Vasylyev et al., 2014; Verma et al., 2020), we used Hodgkin and  
131 Huxley (HH) type of differential equations, which have been shown to be relevant in the context of  
132 the mammalian nervous system (Krouchev et al., 2017). To keep the model as simple as possible, only  
133 a single current (Nav1.7) was added to the original HH scheme. The two different types of sodium  
134 channels included differed only in their parameters (Table 1), the form of the equations was the same  
135 (Eq. 1 to 8 in S1 Appendix). Integration method was the IDA algorithm (e.g., Carnevale, 2007) with a  
136 fixed time step ( $dt$ ) of 0.0025 ms (i.e., 400 time steps per ms). This very small  $dt$  value was selected to  
137 obtain smooth plots when focusing on the brief time window (e.g., 15 ms) surrounding a single spike  
138 (Fig. 4).

139 The parameters (Table 1) are plausible values obtained from rat and human experiments that  
140 appeared in the literature. The equilibrium potentials of the ions, as well as the leak conductance and  
141 cytosolic resistance, were from the modelling study of Choi and Waxman (2011), based on whole cell  
142 patch-clamp recordings performed in rat DRG neurons (Choi et al., 2007). For the size/capacitance of  
143 the cell we relied on human studies (Zhang et al., 2017), which reported that DRG neurons are  
144 moderately bigger than in rat and that the maximum conductance of the ions is generally higher in  
145 human cells. We set our soma as a 50  $\mu$ m diameter and height cylinder, corresponding to a small  
146 human DRG cell in the rat/human comparison histogram presented in the figure 2 of Zhang et al.

147 (2017). The proportion of  $g_{maxNa}$  values between both Na<sup>+</sup> currents was as reported in Choi and  
148 Waxman (2011), with Nav1.7 reaching roughly 0.7 of Nav1.8 value, although we used larger  $g_{max}$  values  
149 for all currents. Using this  $g_{maxNa}$  proportion, the electric charge underlying the spike is mainly provided  
150 by Nav1.8, as it has been reported in C-type DRG neurons (Renganathan et al., 2001).

151 The half activation and half inactivation voltages of the sodium currents were graphically estimated  
152 from the study of Rush et al. (2007) performed in rat DRG neurons (see figure 1-D and E in Rush et al.,  
153 2007), assuming that the TTX sensitive component of the current corresponds to Nav1.7. The study of  
154 Motin et al. (2016) shows a similar voltage-dependence profile of Nav1.7 activation and inactivation  
155 (see figure 3-B in Motin et al., 2016, done with human Nav1.7 channels introduced in CHO cells),  
156 despite the difference in experimental preparations. The main differences between our  
157 representation of both Na<sup>+</sup> currents (Table 1) are the following. Nav1.8 had larger conductance (0.2  
158 S/cm<sup>2</sup>) and more a depolarized half activation ( $d_m = -15$  mV) and half inactivation voltage ( $d_h = -30$  mV).  
159 Nav1.7 had half activation and half inactivation voltages shifted in the hyperpolarizing direction ( $d_m =$   
160  $-30$  mV,  $d_h = -60$  mV) and a smaller value of maximum conductance (0.14 S/cm<sup>2</sup>). We also followed  
161 literature reports stating that Nav1.7 has faster opening/closing rates and slower recovery from  
162 inactivation (repriming) than Nav1.8 (Dib-Hajj et al., 2013; Hamaed, 2019). These gating properties  
163 were implemented through the corresponding A values (Table 1), that multiply the voltage dependent  
164 rates (Eq. 4, 5, 7 and 8). Slow repriming is a relevant feature because it enables the low frequency  
165 firing typical of C fibres (Dib-Hajj et al., 2013). Close state inactivation (Herzog et al., 2003) was not  
166 implemented in the present model, as it would require a more complex Markov-type kinetic (e.g.,  
167 Andreozzi et al., 2019).

168 To simulate erythromelalgia we varied the half activation voltage of Nav1.7 ( $d$  in Eq. 4) from -30 to -  
169 36 mV. This shift is within the range reported for the F1449V mutation (Dib-Hajj et al., 2005). PF-  
170 05089771 effect at a saturating dose was simulated by setting the maximum conductance of Nav1.7 ( $g$   
171  $maxNa$  in Eq. 2) to 0. In the case of OD1, we simultaneously slowed down the inactivation



172 establishment (Eq. 8) and speeded up the inactivation removal (Eq. 7) of Nav1.7, as both rates are  
173 expected to be affected with the toxin (Maertens et al., 2006; Motin et al., 2016). Indeed, we checked  
174 that modifying only the establishment or the removal of the inactivation is enough to increase the  
175 spike frequency and amplitude derivative, as both effects add up. In the simulations of Fig. 3 and 4 we  
176 combined a 10 % variation in the values of both A parameters (Eq. 7 and 8).

177 Simulations lasted 120 ms, with step depolarisations starting at 10 ms and ending at 90 ms. Levels of  
178 constant current (pA) applied are specified in the corresponding figures. Note that the current levels  
179 needed to evoke single and multiple spiking, as well as the duration and amplitude of the spikes, are  
180 of the order to the values shown by Cao et al (2016) in current clamp recordings of hiPSC derived  
181 sensory neurons. Moreover, a recent paper using the same type of neurons reported a rheobase of  
182 100 pA in healthy (control) conditions (see figure 6-A in McDermott et al., 2019), which is very close  
183 to the value produced by our model (138 pA). This confirms that the parameters are biologically  
184 plausible despite having been collected from publications using different methods and mammal  
185 species.

186 The model does not incorporate explicit temperature dependence through scaling factors (Q10), but  
187 it is based on equilibrium potentials and membrane properties (Choi and Waxman, 2011) as well as  
188 half activation voltages (Cummings and Waxman, 1997; Rush et al., 2007) measured at room  
189 temperature. Figures were created with Matlab (R2019a, The MathWorks, Inc.).

190

191

192

193

194

195

|                                                      |          |                                                      |                        |
|------------------------------------------------------|----------|------------------------------------------------------|------------------------|
| <b>General parameter set</b>                         |          | <b>K parameters</b>                                  |                        |
| L ( $\mu\text{m}$ )                                  | 50       | <b>Opening (<math>a_m</math>)</b>                    |                        |
| d ( $\mu\text{m}$ )                                  | 50       | A ( $\text{ms}^{-1}$ )                               | 0.08                   |
| Ra ( $\text{M}\Omega$ )                              | 123      | k ( $\text{ms}^{-1}$ )                               | 0.1                    |
| Cm ( $\mu\text{F}/\text{cm}^2$ )                     | 1        | d (mV)                                               | -55                    |
| gNa_hh ( $\text{S}/\text{cm}^2$ )                    | 0.2      | <b>Closing (<math>b_m</math>)</b>                    |                        |
| gNav1.7_hh ( $\text{S}/\text{cm}^2$ )                | 0.14     | A ( $\text{ms}^{-1}$ )                               | 0.26                   |
| gK_hh ( $\text{S}/\text{cm}^2$ )                     | 0.01     | k ( $\text{ms}^{-1}$ )                               | -0.0125                |
| gL_hh ( $\text{S}/\text{cm}^2$ )                     | 5.75E-05 | d (mV)                                               | -65                    |
| eL_hh (mV)                                           | -58      |                                                      |                        |
| eK (mV)                                              | -85      |                                                      |                        |
| eNa (mV)                                             | 67       |                                                      |                        |
| Initial V (mV)                                       | -72      |                                                      |                        |
| dt (ms)                                              | 0.0025   |                                                      |                        |
| <b>Nav1.8 parameters</b>                             |          | <b>Nav1.7 parameters</b>                             |                        |
| <b>Opening (<math>a_m</math>)</b>                    |          | <b>Opening (<math>a_m</math>)</b>                    |                        |
| A ( $\text{ms}^{-1}$ )                               | 0.3      | A ( $\text{ms}^{-1}$ )                               | 10                     |
| k ( $\text{ms}^{-1}$ )                               | 0.1      | k ( $\text{ms}^{-1}$ )                               | 0.1                    |
| d (mV)                                               | -15      | d (mV)                                               | -30 with EM = -36      |
| <b>Closing (<math>b_m</math>)</b>                    |          | <b>Closing (<math>b_m</math>)</b>                    |                        |
| A ( $\text{ms}^{-1}$ )                               | 4        | A ( $\text{ms}^{-1}$ )                               | 40                     |
| k ( $\text{ms}^{-1}$ )                               | -0.056   | k ( $\text{ms}^{-1}$ )                               | -0.056                 |
| d (mV)                                               | -65      | d (mV)                                               | -65                    |
| <b>Inactivation removal (<math>a_h</math>)</b>       |          | <b>Inactivation removal (<math>a_h</math>)</b>       |                        |
| A ( $\text{ms}^{-1}$ )                               | 0.15     | A ( $\text{ms}^{-1}$ )                               | 0.04 with OD1 = 0.4444 |
| k ( $\text{ms}^{-1}$ )                               | -0.05    | k ( $\text{ms}^{-1}$ )                               | -0.05                  |
| d (mV)                                               | -65      | d (mV)                                               | -65                    |
| <b>Inactivation establishment (<math>b_h</math>)</b> |          | <b>Inactivation establishment (<math>b_h</math>)</b> |                        |
| A ( $\text{ms}^{-1}$ )                               | 1        | A ( $\text{ms}^{-1}$ )                               | 1 with OD1 = 0.9       |
| k ( $\text{ms}^{-1}$ )                               | -0.1     | k ( $\text{ms}^{-1}$ )                               | -0.1                   |
| d (mV)                                               | -30      | d (mV)                                               | -60                    |

196

197 Table 1. Default parameter values used for the simulations. Particular cases are indicated in the  
 198 corresponding figures.

## 199 Results

### 200 Experimental recordings

201 We compared the spontaneous activity of sensory neurons obtained from a control subject (cell line  
 202 AD3, n = 18 cultures) with an erythromelalgia patient (cell line RCi002-A, n = 24 cultures). The

203 percentage of electrodes showing activity was 1.85 % in the control and 5.9 % in the disease cultures.  
204 After spike sorting we found 30 spontaneously active units in the patient and only 7 in the control.  
205 The firing frequency and amplitude of these units were not significantly larger in the disease cultures,  
206 implying that although much more units are active, they do not necessarily fire faster or have spikes  
207 of larger amplitude. It is worth mentioning that the fastest neurons and the tallest spikes were found  
208 in the disease cultures, but the distributions were not significantly different because slow units with  
209 small amplitude were present in both groups as well. The larger number of spontaneously active  
210 neurons found in the disease cultures is consistent with the results of a previous study (Cao et al.,  
211 2016).

212 The cultures from the control subject were treated with OD1 (100 nM), resulting in the percentage of  
213 active channels increasing from 1.85 to 6.02 % and a concomitant increase in the number of active  
214 units, from 7 to 24. An example of the voltage data before and after treatment is presented in Fig 1-  
215 A, note the increase in spontaneous activity rate and amplitude. The same effect was observed in an  
216 erythromelalgia culture conducted as a verification (not shown).

217 **Fig 1. Effects of OD1 in hiPSC derived sensory neurons.** (A) Representative example of voltage data in  
218 MEA 1 before (upper panel) and after (lower panel) OD1 (100 nM) application. Note the increase in  
219 rate and amplitude of the spontaneous spikes. (B) Rate and amplitude of paired neurons before and  
220 after OD1 (100 nM) application. Corresponding pairs in both plots are colour coded. Wilcoxon signed  
221 rank test p values are printed in each panel. The normalized changes of both indexes are highly  
222 correlated ( $r = 0.78$ ).

223 Pairing all the units that were active before and after OD1 application in the control cells ( $n = 7$ ), we  
224 found that both the spike frequency and amplitude increased significantly (Fig 1-B). Although the  
225 increase in amplitude was not dramatic (20 % in average), it was consistently found in every pair of  
226 units. The extent of the increase in firing frequency was more pronounced (70 %). The unpaired units

227 that were initially silent and started to fire after the OD1 were not significantly different in rate and  
228 amplitude from those already active before the treatment.

229 The cells from the patient were treated with PF05089771 (100 nM). The percentage of channels with  
230 spiking activity fell from 5.9 to 2.08 %. Twenty four out of thirty of the units sorted stopped firing in  
231 the presence of the drug. A typical example of the raw voltage trace before and after treatment is  
232 presented in Fig 2-A, note the suppression of the spiking activity. Pairing the few units that remained  
233 active after the treatment (n=6), we found that the spike frequency significantly decreased but the  
234 amplitude did not change (Fig 2-B). The unpaired units that stopped firing as a result of the  
235 PF05089771 application were not significantly different in rate and amplitude to the ones that  
236 remained active after treatment.

237 **Fig 2. Effects of PF05089771 in hiPSC derived sensory neurons.** (A) Representative example of voltage  
238 data before and after PF-05089771 (100 nM). Note the firing suppression. (B) Rate and amplitude of  
239 the neurons paired before and after treatment. The normalized changes in both indexes are poorly  
240 correlated ( $r = 0.21$ ).

241 In order to assess for functional evidence of possible synaptic connectivity, we calculated cross  
242 correlation histograms between the firing times of the neurons that were recorded from the same  
243 electrode. No histogram peaks at fixed latency were found, which is compatible with the established  
244 notion that primary nociceptive neurons do not form synaptic contacts between them.

#### 245 **Numerical simulations**

246 In this subsection we present the results obtained with the computational model explained in  
247 Methods. The parameter set is provided in Table 1 and the model equations in S1 Appendix.

248 Erythromelalgia condition was simulated through a change in the Nav1.7 half-activation voltage  
249 parameter ( $d$  in Eq. 4) from -30 to -36 mV. OD1 effects were simulated through an increase in the  
250 constant that multiplies the inactivation removal rate ( $A$  from 0.04 to 0.044 in Eq. 7) and a

251 simultaneous decrease in the constant that multiplies inactivation establishment rate ( $A$  from 1 to 0.9  
252 in Eq. 8).

253 Fig. 3 shows simulations of control conditions (upper row), erythromelalgia (middle row) and OD1  
254 treatment (bottom row). The minimum current level able to evoke a single spike (rheobase) is shown  
255 in the left column. The cyan traces are responses to constant currents just below threshold, while  
256 the blue traces show the rheobase responses. The current levels (printed in the corresponding  
257 panels) are of the order shown in Cao et al. (2018). Note that the rheobase decreased in both  
258 erythromelalgia and OD1 simulations, in comparison with the control.

259 **Fig 3. Simulations of membrane potential.** Control conditions (upper row), erythromelalgia (middle  
260 row) and OD1 application (bottom row). The left column shows rheobases and the middle column  
261 shows thresholds for sustained spiking. Supra-threshold responses and PF-05089771 treatment are  
262 depicted in the right column.

263 The blue traces in the middle column of Fig. 3 show the minimum level of current needed to evoke  
264 sustained spiking. The current levels are printed in the corresponding panels, note again the  
265 decrease in erythromelalgia and OD1 simulations. The cyan traces represent responses to the  
266 highest level of current that evoked only a single spike.

267 The red traces of the third column show the response of control (upper row), erythromelalgia  
268 (middle row) and OD1 (bottom row) simulations to the minimum current level that was able to  
269 evoke continuous spiking in control conditions (146 pA). Note that both erythromelalgia and OD1  
270 simulations reached higher spiking rate than control. The green plots show the same responses after  
271 blocking Nav1.7 receptors. The spiking activity stopped in all cases, mimicking the analgesic  
272 treatment with the Nav1.7 blocker PF-05089771 at a saturating dose.

273 The possible mechanism behind the enhanced extracellular spike amplitude observed after OD1  
274 treatment (Fig. 1) is addressed in the simulation of Fig. 4. We focused on the third spike of the

275 simulated train because it is representative of the continuous firing regime. The order of the spike is  
276 not important providing that we avoid the first one after the onset of the current step, which is  
277 slightly taller. This is due to less Na<sup>+</sup> inactivation, as the first spike is the only one that starts from the  
278 resting potential before the stimulus. In the spikes that follow this initial transient, the peak value of  
279 the membrane voltage and Na<sup>+</sup> currents reaches a stable level. By choosing the third spike of the  
280 train we make sure that our assessment applies to a typical spike within a train of repetitive firing,  
281 without being influenced by the initial conditions of the stimulus.

282 **Fig 4. Simulations of membrane potential and its derivative.** Third spike within a train of sustained  
283 spiking. In the left panel, the membrane potentials (mV) are plotted against time (ms) with thin lines  
284 and their corresponding minus derivatives (mV/dt) are plotted with thick lines (x100). Blue traces  
285 represent control conditions (A in  $a_h = 0.04 \text{ ms}^{-1}$ , A in  $b_h = 1.0 \text{ ms}^{-1}$ ) and red traces represent OD1  
286 application (A in  $a_h = 0.044 \text{ ms}^{-1}$ , A in  $b_h = 0.9 \text{ ms}^{-1}$ ), both under a depolarizing current of 200 pA. In  
287 the right panel, the membrane potential (mV) is plotted against its minus first derivative (mV/dt),  
288 red line for OD1 and blue line for control. The black line shows the result for control gating  
289 parameters with a depolarizing current of 221.41 pA to match the spiking rate observed in the OD1  
290 simulation.

291 The simulation of OD1 treatment (A in  $a_h = 0.044 \text{ ms}^{-1}$ , A in  $b_h = 0.9 \text{ ms}^{-1}$ ) is plotted with red traces  
292 and the control (A in  $a_h = 0.04 \text{ ms}^{-1}$ , A in  $b_h = 1.0 \text{ ms}^{-1}$ ) with blue traces (Fig. 4), in both cases the  
293 model neuron spiked regularly in response to a 200 pA supra-threshold constant depolarizing  
294 current. Membrane voltages are represented with thin lines (Fig. 4, left panel). Note that the red  
295 spike (OD1) occurs before the blue spike (control), due to its higher firing rate (or shorter inter spike  
296 interval) with little amplitude difference. This picture changes when we look at the minus first  
297 derivative of the intracellular spike, which has been shown to constitute a reasonable estimation of  
298 the extracellular spike (e.g., Figure 1 in Henze et al., 2000). The thick traces in Fig. 4 (left panel) show  
299 the minus first derivative of the voltage (x100 for better graphical comparison with the voltage

300 traces of the same colours). Note that the red derivative reached considerably larger amplitude than  
301 the blue one (thick traces), contrasting with the membrane voltages (thin traces) that showed small  
302 amplitude differences. The first derivative corresponds to the slope, meaning that the red spike  
303 reaches higher slope at its maximum point than the blue spike as a consequence of the Nav1.7  
304 inactivation impairment.

305 In order to assess if any increase in the model firing rate is expected to come accompanied by an  
306 increase of the peak derivative, we created exactly the same frequency shift by increasing the level  
307 of constant current. The result is displayed in the simulation of the right panel of Figure 4, where we  
308 plotted the membrane voltage in abscissas against its minus first derivative in ordinates, for the third  
309 spike of the simulated train. Following the same colour code of the left panel, the simulation of OD1  
310 is represented with red trace and the control with blue trace. The black line shows a simulation with  
311 control Nav1.7 inactivation rates (A in  $a_h = 0.04 \text{ ms}^{-1}$ , A in  $b_h = 1.0 \text{ ms}^{-1}$ ) after increasing the constant  
312 current from 200 to 221.45 pA, in order to obtain exactly the same spike timing observed in the OD1  
313 simulation. In this representation, the rightmost point of the orbits corresponds to the spike peak  
314 while their lowest point corresponds to the peak derivative. Note that the peak derivative reached  
315 larger value in the red than in the black plot, both exceeding the level observed in the blue plot. This  
316 means that increasing the spike rate through an impairment of Nav1.7 inactivation has a much  
317 stronger effect on the spike ascending slope (derivative) than the same rate shift created with an  
318 increased level of constant current. In contrast, the spike peak (right edge of the orbits) is the same  
319 in the red and black plots.

320 To summarize, we considered the hypothesis that the extracellular spike was taller after OD1  
321 treatment mainly because the intracellular spike reached higher slope in the ascending phase. The  
322 model simulation of Fig. 4 confirmed the plausibility of the proposed mechanism and showed that  
323 the amplitude effect is expected to be larger when the rate increase is created through the

324 inactivation parameters. However, our hypothesis cannot be truly confirmed without a simultaneous  
325 intracellular recording, which we aim to perform in the future.

## 326 **Discussion**

327 In this study, we performed to our knowledge the first test of the scorpion toxin OD1 in hiPSC-derived  
328 sensory neurons recorded in MEAs. The main effect of this toxin is to block the fast inactivation process  
329 of the threshold current Nav1.7 (Motin et al., 2016). Our extracellular recordings also confirmed  
330 previous findings of Cao et al. (2016) with current clamp regarding the increased spontaneous firing  
331 of erythromelalgia sensory neurons and the “analgesic” *in vitro* effects of PF-05089771. The effects of  
332 both compounds were explained using a conductance-based computational model.

### 333 **Erythromelalgia and PF-05089771**

334 Cao et al. (2016) performed intracellular recordings of hiPSC derived sensory neurons in the current  
335 clamp configuration, comparing erythromelalgia patients with control subjects. Despite the  
336 heterogeneity of the samples, they found a significantly higher proportion of spontaneously firing cells  
337 in patients compared to those from control donors. Moreover, the patient’s cells showed a lower  
338 rheobase and reached higher firing rates in response to stimulation with current steps of increasing  
339 amplitudes. These findings point to the existence of elevated excitability in erythromelalgia cells, a  
340 fact that we confirmed in the present study by showing higher prevalence of spontaneous activity in  
341 MEA recordings (see Results).

342 Different neuronal gain of function mutations causing erythromelalgia have in common the fact that  
343 the Nav1.7 channel opens with smaller depolarisations, with leftwards shifts in the current-voltage  
344 relationship ranging from 5 to 10 mV in the case of the F1449V mutation (Dib-Hajj et al., 2005).  
345 According to these reports, we adopted a plausible value of -6 mV in our schematic model simulations  
346 of the disease. After this manipulation, the rheobase and the threshold for sustained spiking



347 decreased dramatically, driving the model neuron towards a spontaneous firing regime of higher  
348 frequency.

349 Spontaneous firing in our cultures is due only to intrinsic cell excitability, as there are no reports about  
350 the formation of synapses between primary sensory neurons *in vitro*. Accordingly, we did not find  
351 evidence of functional connections in cross correlation histograms between neuronal firing times.  
352 Furthermore, in dissociated cell cultures the development of a synaptic network is usually  
353 accompanied by the emergence of population bursts (Maeda et al., 1995) which we did not observe  
354 here. Glia cells are not present in the cultures, so their reported contribution to abnormal neuronal  
355 activity in intact DRG preparations *in vitro* (Belzer and Hanani, 2019) can also be ruled out.

356 Regarding the effects of Nav1.7 channel blockers, Cao et al. (2016) reported a dose dependent  
357 reduction in spontaneous firing and an increase in the action potential rheobase. We were able to  
358 suppress the firing with a high dose of PF-05089771 (Fig 2), confirming the fact that the excitability of  
359 the cells plummets after the treatment. The clinical efficacy of the drug, however, was inconclusive in  
360 the study of Cao et al. (2016), showing statistical significance vs placebo only at the 10% level at the 4  
361 to 5 and 8 to 9 hour time points after dosing. In other clinical reports the compound has failed to  
362 produce significant pain relief (Emery, 2016; McDonnell et al., 2018), contrasting with our *in vitro*  
363 recordings and numerical simulations. It has been suggested that the lack of penetration across the  
364 peripheral nerve sheet by hydrophobic molecules of high molecular weight can be behind the failure  
365 of PF-05089771 to produce significant pain relief when administrated systemically (Yekkirala et al.,  
366 2017).

### 367 **Effects of OD1**

368 The excitability increase in the presence of OD1 reported with voltage clamp recordings (Maertens et  
369 al., 2006) was confirmed in our extracellular recordings by the increase in the proportion of electrodes  
370 showing spontaneous firing, together with the faster rate observed in the neurons that were already  
371 active before the toxin application. Remarkably, the toxin also kindled many silent neurons into

372 activity. In addition, we found a consistent increase of the extracellular spike amplitude after OD1  
373 which has not been described before with MEA recordings. We further discuss this last point in the  
374 next subsection with the numerical simulations.

375 Intra-plantar OD1 injections have been validated as a mouse model of Nav1.7-mediated pain, allowing  
376 Nav1.7 inhibitors profiling through measurement of neuronal firing and pain behaviours (Deuis et al.,  
377 2016). The effects of OD1 and analogue toxins were evaluated with voltage clamp whole cell  
378 recordings in Chinese hamster ovary (CHO) cells expressing human Nav1.7 channels (Deuis et al., 2016;  
379 Motin et al., 2016). These studies found that the decay phase of the current slows down in a  
380 concentration-dependent manner in the presence of the toxins due to impairment of fast inactivation.  
381 This effect, typical among  $\alpha$ -scorpion toxins, is created by a combination of slower inactivation  
382 establishment with a faster recovery from inactivation (reprisal).  $\beta$ -scorpion toxins, on the other hand,  
383 shift the current activation to more negative potentials, as happens in erythromelalgia mutations. In  
384 the case of OD1 this last effect has small magnitude (Motin et al., 2016), in accordance with earlier  
385 observations in *Xenopus laevis* oocytes with Nav1.7 channels expression (Maertens et al., 2006). A  
386 minor effect on the voltage dependence of channel inactivation has been also reported at higher OD1  
387 doses (300 mM, Deuis et al., 2016) than we used here (100 mM). Following these descriptions, we  
388 focused only on the inactivation to model OD1 effects in our computational model, slowing down the  
389 rate of inactivation establishment and speeding up its removal.

### 390 **Numerical simulations**

391 The computational model that we present here is able to provide satisfactory explanations at a  
392 qualitative level for the main experimental findings of our study. We did not attempt to perform a  
393 complete exploration of the parameter space but all values are biologically plausible. In the absence  
394 of stimulation the membrane potential tends to its fixed point which is the resting potential. By  
395 injecting an amount of current of the order used in recordings of hiPSC derived sensory neurons (Cao  
396 et al., 2016; McDermott et al., 2019) the system reaches a critical point (e.g., Ermentrout and Terman,

2010) that corresponds to the spike threshold. In this very fast transition the stability of the system switches and a periodic solution arises, configuring what mathematicians in dynamical system theory call a "canard" (the French word for "duck"). In a "canard" (Börgers, 2017), large amplitude oscillations appear suddenly with very small variations of a driving parameter, the depolarizing current in our case ( $I_{ext}$  in Eq. 15). At first the periodic oscillation comprises only one cycle (rheobase level). If the depolarizing current is sufficiently large the model generates a periodic response of repetitive spiking. In Fig. 3 we used these two very relevant thresholds (single spike and sustained repetitive firing) to illustrate the pain created by the enhanced firing of nociceptors that occurs in erythromelalgia patients (McDonnell et al., 2016), and in healthy individuals after a scorpion sting (e.g., Garfunkel et al., 2007). When the level of current is above the threshold for repetitive firing, the increased excitability is manifested with higher firing rate, which can be abolished by blocking the Nav1.7 receptors in the simulation, with no need of additional Nav1.8 targeting.

Regarding the increased amplitude of the extracellular spike observed after OD1, we suggest that it can be mainly due to an increased slope in the ascending phase of the intracellular spike, combined with a minor growth of its amplitude. This interpretation is based on the observation that the minus first derivative of the intracellular voltage is a reasonable approximation of the extracellular spike (Henze et al., 2000). We showed that the first derivative (slope) is far more sensitive to inactivation blocking than to increases of the depolarizing current (Fig. 4). The comparison is based on the fact that both manipulations created exactly the same effect on the spiking rate. Thus, although the intracellular spike is not much larger after OD1, the extracellular spike can grow dramatically because the intracellular slope is highly sensitive to the inactivation gating. Although the proposed mechanism is plausible, simultaneous intra and extracellular recordings are needed to confirm the hypothesis. A comparable scenario in the opposite direction has been described after treatment with the selective Nav1.8 blocking (e.g., Fig. 5 in Payne, et. al., 2015), in the sense that both the intracellular voltage and its derivative were decreased by the drug. An important difference, however, is that in our case the effect of the slope appears to be dominant.

423 One aspect that the model does not explain is that the few remaining spikes observed after PF-  
424 05089771 treatment showed no amplitude decrease, although the firing rate tended to decrease ( $p =$   
425 0.03 in 6 neurons). We checked that mild blocking of Nav1.7 conductance decreases the slope and  
426 thus the amplitude of the spike derivative in our model. The neurons that persisted in firing (Fig. 2)  
427 proved to be relatively resistant to a saturation dose of PF-05089771 that terminated the activity in  
428 80 % of the units (24 out of 30). One possibility is that this subpopulation (20 %) was resilient because  
429 the neurons had less Nav1.7 expression. In this case, our model based on Nav1.7 effects would not be  
430 applicable. For OD1, all neurons active in control conditions were sensitive to the compound, both in  
431 the discharging rate and amplitude, suggesting that they had significant Nav1.7 expression.

#### 432 **Extracellular recordings and ionic currents**

433 Although extracellular recordings are typically used to detect firing times, they also have the  
434 theoretical ability to report about what are considered to be intracellular features of the action  
435 potential (Gold et al., 2006). We want to highlight this possibility of using extracellular recordings to  
436 detect changes in ionic currents. If researchers first evaluate them together with voltage clamp data  
437 for validation purposes, they can then benefit from the opportunity to observe more neurons  
438 simultaneously. Our computational model allowed to relate the amplitude of an extracellular spike  
439 with Nav1.7 gating. Whether this could really be the footprint of a current in the extracellular spike  
440 needs to be assessed with current clamp and whole cell voltage clamp recordings of hiPSC derived  
441 sensory neurons, designing the right experiments to have a direct measure all relevant model  
442 parameters.

#### 443 **Model limitations**

444 In this article we provide a starting point model to explain firing behaviour linked to chronic pain.  
445 Several of the relevant parameters were obtained from published observations in rats and humans  
446 (Table 1). In the absence of direct measurements, some parameters were filled with “educated  
447 guesses”, but they are biologically plausible. In order to keep the model simple and with a clear

448 biological meaning and physical unit for all variables, we opted for a modified HH scheme, which also  
449 has the virtue of being familiar to neurobiologists although more refined kinetic schemes have been  
450 introduced (e.g., Andreozzi et al., 2019). We included only one potassium current of non-inactivating  
451 type to avoid unnecessary complexity. The only added current to the original HH scheme was the  
452 Nav1.7, because it is strictly needed to implement the biological mechanisms under consideration. A  
453 detailed quantitative modelling would require Ca<sup>++</sup> currents (e.g., Scroggs and Fox, 1992) and several  
454 types of Na<sup>+</sup> (Rush et al., 2007; Zhang et al., 2017) and K<sup>+</sup> (Zemel et al., 2018) currents that have been  
455 found in mammalian DRG cells, and is beyond the scope of this study. We are adopting a level of  
456 simplification in the modelling process that is fitted for the purpose of explaining our experimental  
457 results with MEA recordings regarding compounds that specifically target Nav1.7 receptors.

#### 458 **Importance of the interaction between sodium currents**

459 The main focus of this discussion is Nav1.7 due to its direct relation with the compounds tested. OD1  
460 is a potent and selective modulator of Nav1.7, which does not affect Nav1.8 (Maertens et al., 2006)  
461 and PF-05089771 is a selective blocker of Nav1.7 receptors (Cao et al., 2016). However, we must take  
462 into account the complex interaction between Nav1.7 and Nav1.8 in the excitability tuning of sensory  
463 neurons (Choi and Waxman, 2011). Indeed, modulations of Nav1.8 alone largely affect the excitability.  
464 For example, the selective Nav1.8 channel blocker PF-01247324 attenuates neuronal firing and  
465 reduces the slope and peak value of the action potential in dissociated rat and human DRG neurons  
466 from organ donors with short post-mortem delay (Payne, et. al., 2015).

467 To resolve the conundrum of how Nav1.7 and Nav1.8 can be successfully targeted to treat neuropathic  
468 and inflammatory pain is beyond the scope of this article, but we want to finish this discussion  
469 summarizing a remarkable example (Rush et al., 2006, and references therein) of how the interaction  
470 between sodium currents can have profound functional consequences for the clinical signs of  
471 erythromelalgia. As explained in the Introduction, in pain pathways Nav1.7 increases neuronal  
472 excitability mainly by amplifying the depolarization caused by peripheral stimuli, allowing to trigger

473 Nav1.8 which then creates most of the spike. This facilitates firing and pain, an effect that is  
474 exaggerated in erythromelalgia patients. A key property for this firing to occur (as implemented in our  
475 model) is that Nav1.8 does not inactivate until the voltage is quite high (e.g., -30 mV). In the  
476 sympathetic nervous system the situation is different because there are no Nav1.8 channels and spikes  
477 are sustained by other sodium currents that inactivate at lower voltage (Rush et al., 2006). Then, the  
478 excessive depolarization created by a mutated Nav1.7 in erythromelalgia can be sufficient to trigger  
479 inactivation, terminating the firing in the sympathetic nerves that mediate the contraction of  
480 peripheral blood vessels. This results in excessive vasodilatation, creating the typical sign of red  
481 extremities that gave name to the disease (erythromelalgia could be translated as “red neuralgia of  
482 the extremities”). The importance of the interaction between sodium currents is asserted by this  
483 example, because the same Nav1.7 neuronal mutation produces opposite effects in the firing of pain  
484 afferents and autonomic motor neurons.

#### 485 **Concluding remarks**

486 In this study we first used MEAs to evaluate Nav1.7 gating in hiPSC derived sensory neurons. Previous  
487 voltage clamp reports regarding the excitability effects of OD1 and PF-05089771 were confirmed. In  
488 addition, we found an unexpected effect of OD1 on the extracellular spike amplitude. To explain the  
489 results we constructed a conductance based computational model that highlights the importance of  
490 the intracellular spike slope to determine the amplitude of the extracellular spike.

#### 491 **Acknowledgements**

492 ~~Study funded by MRC BH171892.~~

#### 493 **References**

494 Abdo H, Calvo-Enrique L, Martinez Lopez J, Song J, Zhang MD, Usoskin D, et al. Specialized cutaneous  
495 Schwann cells initiate pain sense. *Science*. 2019;365: 695-699.

496 Andreozzi E, Carannante I, D'Addio G, Cesarelli M, Balbiet P. Phenomenological models of Nav1.5. A  
497 side by side, procedural, hands-on comparison between Hodgkin-Huxley and kinetic formalisms. *Sci*  
498 *Rep.* 2019;9: 17493.

499 Belzer V, Hanani M. Nitric oxide as a messenger between neurons and satellite glial cells in dorsal  
500 root ganglia. *Glia.* 2019;67(7): 1296-1307.

501 Blatt M, Wiseman S, Domany E. Superparamagnetic Clustering of Data. *Phys Rev Lett.* 1996;76: 3251-  
502 3254.

503 Börgers C. Canard Explosions. In: *An Introduction to Modeling Neuronal Dynamics. Texts in Applied*  
504 *Mathematics*, vol 66. Springer, Cham; 2017.

505 Cao L, McDonnell A, Nitzsche A, Alexandrou A, Saintot PP, Loucif AJC et al. Pharmacological reversal  
506 of a pain phenotype in iPSC-derived sensory neurons and patients with inherited erythromelalgia. *Sci*  
507 *Transl Med.* 2016;8, 335ra56335ra56.

508 Carnevale T. Neuron simulation environment. *Scholarpedia.* 2007;2(6):1378.

509 Choi JS, Dib-Hajj SD, Waxman SG. Differential slow inactivation and use-dependent inhibition of  
510 Nav1.8 channels contribute to distinct firing properties in IB4+ and IB4- DRG neurons. *J.*  
511 *Neurophysiol.* 2007;97: 1258-1265.

512 Choi JS, Waxman SG. Physiological interactions between Nav1.7 and Nav1.8 sodium channels: a  
513 computer simulation study. *J Neurophysiol.* 2011;106: 3173-3184.

514 Cummins TR, Waxman SG. Downregulation of Tetrodotoxin-Resistant Sodium Currents and  
515 Upregulation of a Rapidly Repriming Tetrodotoxin-Sensitive Sodium Current in Small Spinal Sensory  
516 Neurons after Nerve Injury. *J. Neurosci.* 1997;17(10): 3503-3514.

517 Dib-Hajj SD, Rush AM, Cummins TR, Hisama FM, Novella S, Tyrrell L et al. Gain-of-function mutation  
518 in Nav1.7 in familial erythromelalgia induces bursting of sensory neurons. *Brain.* 2005;128: 1847-  
519 1854.

- 520 Dib-Hajj SD, Yang Y, Black JA, Waxman SG. The Na(V)1.7 sodium channel: from molecule to man. *Nat*  
521 *Rev Neurosci.* 2013;14 (1): 49-62.
- 522 Emery EC, Luiz AP, Wood JN. Nav1.7 and other voltage-gated sodium channels as drug targets for  
523 pain relief. *Expert Opin Ther Tar.* 2016;20(8): 975-983.
- 524 Ermentrout GB, Terman DH. *Mathematical Foundations of Neuroscience.* New York: Springer; 2010.
- 525 Garfunkel LC, Kaczorowski JM, Christy C, editors. *Pediatric Clinical Advisor.* 2nd ed. Philadelphia:  
526 Mosby; 2007.
- 527 Gold C, Henze DA, Koch C, Buzsáki G. On the Origin of the Extracellular Action Potential Waveform: A  
528 Modeling Study. *J Neurophysiol.* 2006;95(5): 3113-3128.
- 529 Hameed S. Nav1.7 and Nav1.8: Role in the pathophysiology of pain. *Mol. Pain.* 2019;15: 1-11.
- 530 Henze DA, Zsolt B, Csicsvari J, Mamiya A, Harris KD, Buzsáki G. Intracellular features predicted by  
531 extracellular recordings in the hippocampus in vivo. *J. Neurophysiol.* 2000;84: 390-400.
- 532 Herzog RI, Cummins TR, Ghassemi F, Dib-Hajj SD, Waxman SG. Distinct repriming and closed-state  
533 inactivation kinetics of Nav1.6 and Nav1.7 sodium channels in mouse spinal sensory neurons. *J*  
534 *Physiol.* 2003;551: 741–750.
- 535 Hilgen G, Sorbaro M, Pirmoradian S, Muthmann JO, Kepiro IE, Ullo S et al. Unsupervised Spike  
536 Sorting for Large-Scale, High-Density Multielectrode Arrays. *Cell Reports.* 2017;18(10): 2521-2532.
- 537 Khouzam RH. Chronic pain and its management in primary care. *South Med J.* 2000;93(10):946-945.
- 538 Kovalsky Y, Amir R, Devor M. Simulation in Sensory Neurons Reveals a Key Role for Delayed Na<sup>+</sup>  
539 Current in Subthreshold Oscillations and Ectopic Discharge: Implications for Neuropathic Pain. *J.*  
540 *Neurophysiol.* 2009;102: 1430-1442.
- 541 Krouchev NI, Rattay F, Sawan M, Vinet A. From Squid to Mammals with the HH Model through the  
542 Nav Channels' Half-Activation-Voltage Parameter. *PLoS ONE.* 2015;10(12): e0143570.



- 543 Lera Ruiz M, Kraus RL. Voltage-Gated Sodium Channels: Structure, Function, Pharmacology, and  
544 Clinical Indications. *J. Med. Chem.* 2015;58: 7093–7118.
- 545 Maeda E, Robinson HPC, Kawana A. The mechanisms of generation and propagation of synchronized  
546 bursting in developing networks of cortical neurons. *J Neurosci.* 1995;15(10): 6834-6845.
- 547 Maertens C, Cuypers E, Amininasab M, Jalali A, Vatanpour H, Tytgat J. Potent modulation of the  
548 voltage-gated sodium channel Nav1.7 by OD1, a toxin from the scorpion *Odonthobuthus doriae*. *Mol*  
549 *Pharmacol.* 2006;70(1): 405-414.
- 550 McDermott LA, Weir GA, Themistocleous AC, Segerdahl AR, Blesneac I, Baskozos G et al. Defining the  
551 Functional Role of Nav1.7 in Human Nociception. *Neuron.* 2019;101(5): 905–919.
- 552 McDonnell A, Schulman B, Ali Z, Dib-Hajj SD, Brock F, Cobain S et al. Inherited erythromelalgia due  
553 to mutations in SCN9A: natural history, clinical phenotype and somatosensory profile. *Brain.*  
554 2016;139(4): 1052-1065.
- 555 McDonnell A, Collins S, Ali Z, Iavarone L, Surujbally R, Kirby S et al. Efficacy of the Nav1.7 blocker PF-  
556 05089771 in a randomised, placebo-controlled, double-blind clinical study in subjects with painful  
557 diabetic peripheral neuropathy. *Pain.* 2018;159(8): 1465-1476.
- 558 McDougal RA, Morse TM, Carnevale T, Marengo L, Wang R, Migliore M et al. Twenty years of  
559 ModelDB and beyond: building essential modeling tools for the future of neuroscience. *J Comput*  
560 *Neurosci.* 2017;42(1):1-10.
- 561 Motin L, Durek T, Adams DJ. Modulation of human Nav1.7 channel gating by synthetic  $\alpha$ -scorpion  
562 toxin OD1 and its analogs. *Channels.* 2016;10(2): 139-147.
- 563 Payne CE, Brown AR, Theile JW, Loucif AJC, Alexandrou AJ, Fuller MD et al. A novel selective and  
564 orally bioavailable Nav1.8 channel blocker, PF-01247324, attenuates nociception and sensory  
565 neuron excitability. *Br. J. Pharmacol.* 2015;172: 2654-2670.

- 566 Quian Quiroga R, Nadasdy Z, Ben-Shaul Y. Unsupervised Spike Detection and Sorting with Wavelets  
567 and Superparamagnetic Clustering. *Neural Comp.* 2004;16: 1661-1687.
- 568 Renganathan M, Cummins TR, Waxman SG. Contribution of Na(v)1.8 sodium channels to action  
569 potential electrogenesis in DRG neurons. *J Neurophysiol.* 2001;86(2): 629-640.
- 570 Rush AM, Cummins TR, Waxman SG. Multiple sodium channels and their roles in electrogenesis  
571 within dorsal root ganglion neurons. *J Physiol.* 2007;579(1): 1-14.
- 572 Rush AM, Dib-Hajj SD, Liu S, Cummins TR, Black JA, Waxman SG. A single sodium channel mutation  
573 produces hyper or hypoexcitability in different types of neurons. *PNAS.* 2006;103(21): 8245-8250.
- 574 Scroggs RS, Fox AP. Multiple Ca<sup>2+</sup> currents elicited by action potential waveforms in acutely isolated  
575 adult rat dorsal root ganglion neurons. *J Neurosci.* 1992;12(5): 1789-1801.
- 576 Serpell M. Anatomy, physiology and pharmacology of pain. *Surgery Oxford.* 2006;24(10): 350-353.
- 577 Van Hecke O, Torrance N, Smith BH. Chronic pain epidemiology and its clinical relevance. *Br J*  
578 *Anaesth.* 2013;111(1): 13-18.
- 579 Vasylyev DV, Han C, Zhao P, Dib-Hajj S, Waxman SG. Dynamic-clamp analysis of wild-type human  
580 Nav1.7 and erythromelalgia mutant channel L858H. *J Neurophysiol.* 2014;111: 1429-1443.
- 581 Verma P, Kienle A, Flockerzi D, Ramkrishna D. Computational analysis of a 9D model for a small DRG  
582 neuron. *arXiv:2001.04915v1 [q-bio.NC]*, 2020.
- 583 Wilson PG, Stice SS. Development and differentiation of neural rosettes derived from human  
584 embryonic stem cells. *Stem Cell Reviews.* 2006;2(1): 67-77.
- 585 Yekkirala AS, Roberson DP, Bean BP, Woolf CJ. Breaking barriers to novel analgesic drug  
586 development. *Nat Rev Drug Discov.* 2017;16(8): 545-564.
- 587 Zemel BM, Ritter DM, Covarrubias M, Muqem T. A-Type KV Channels in Dorsal Root Ganglion  
588 Neurons: Diversity, Function, and Dysfunction. *Front Mol Neurosci.* 2018;11: 253.

589 Zhang X, Priest BT, Belfer I, Gold MS. Voltage-gated Na<sup>+</sup> currents in human dorsal root ganglion  
590 neurons. eLife. 2017;6: e23235.

bioRxiv preprint doi: <https://doi.org/10.1101/2020.08.04.235861>; this version posted August 4, 2020. The copyright holder for this preprint (which was not certified by peer review) is the author/funder, who has granted bioRxiv a license to display the preprint in perpetuity. It is made available under aCC-BY 4.0 International license.

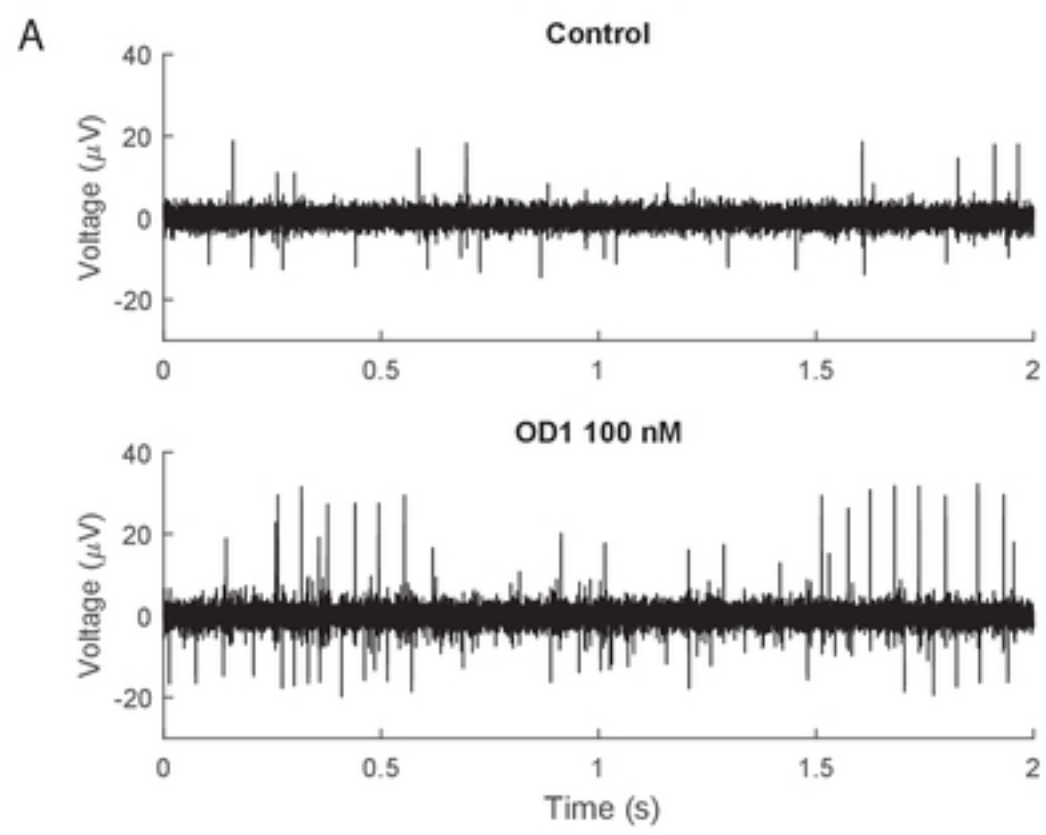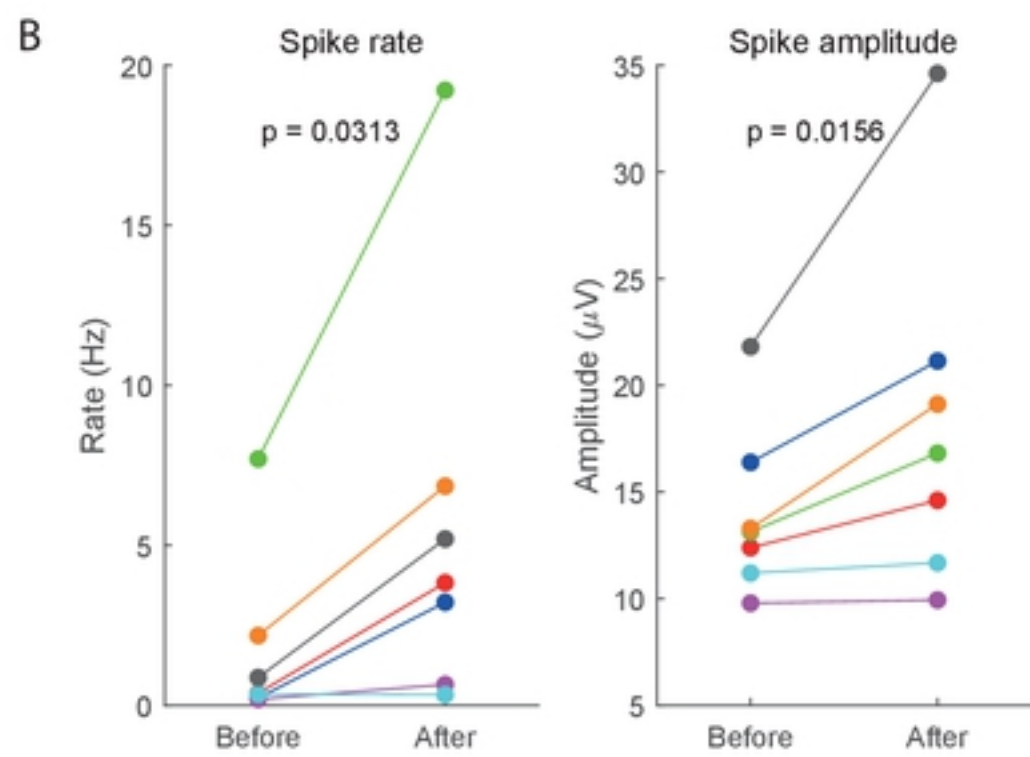

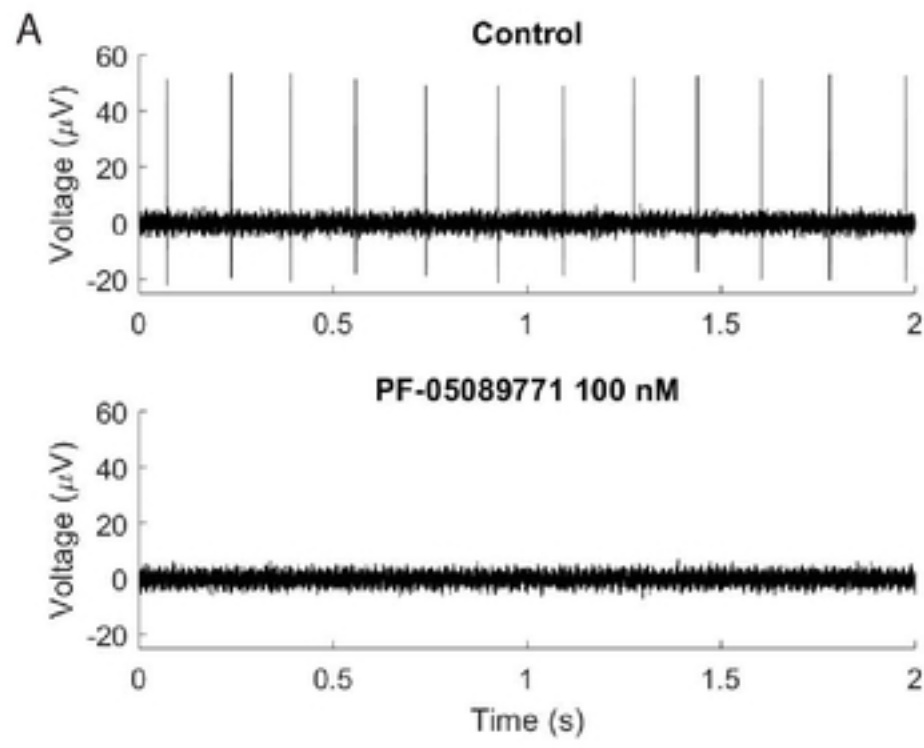

bioRxiv preprint doi: <https://doi.org/10.1101/2020.08.04.235861>; this version posted August 4, 2020. The copyright holder for this preprint (which was not certified by peer review) is the author/funder, who has granted bioRxiv a license to display the preprint in perpetuity. It is made available under aCC-BY 4.0 International license.

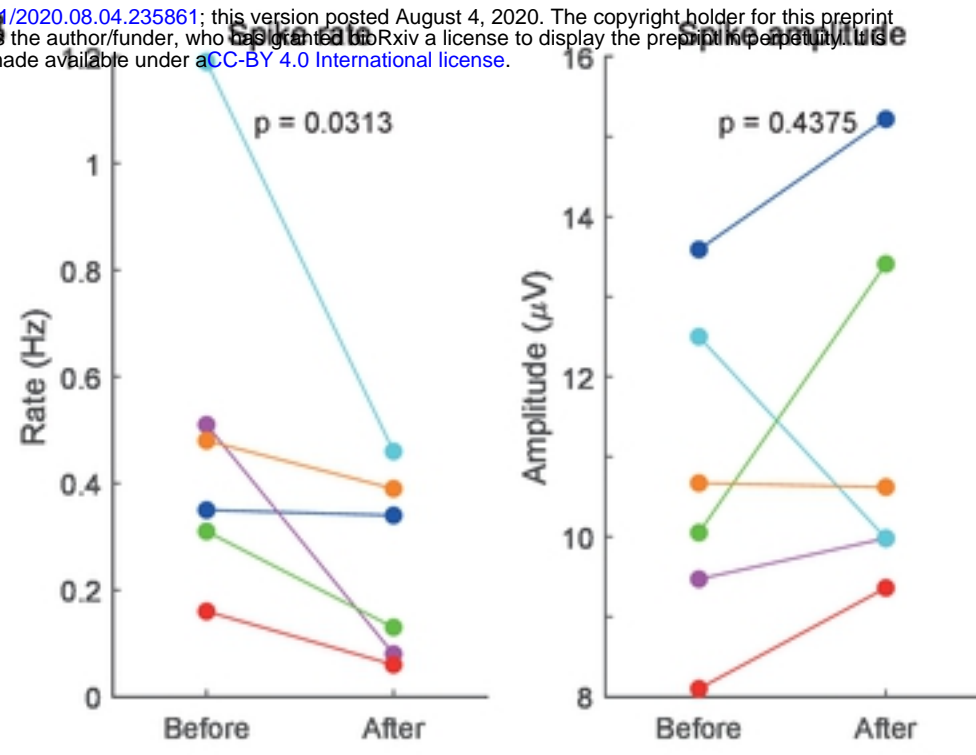

bioRxiv preprint doi: <https://doi.org/10.1101/2020.08.04.235861>; this version posted August 4, 2020. The copyright holder for this preprint (which was not certified by peer review) is the author/funder, who has granted bioRxiv a license to display the preprint in perpetuity. It is made available under aCC-BY 4.0 International license.

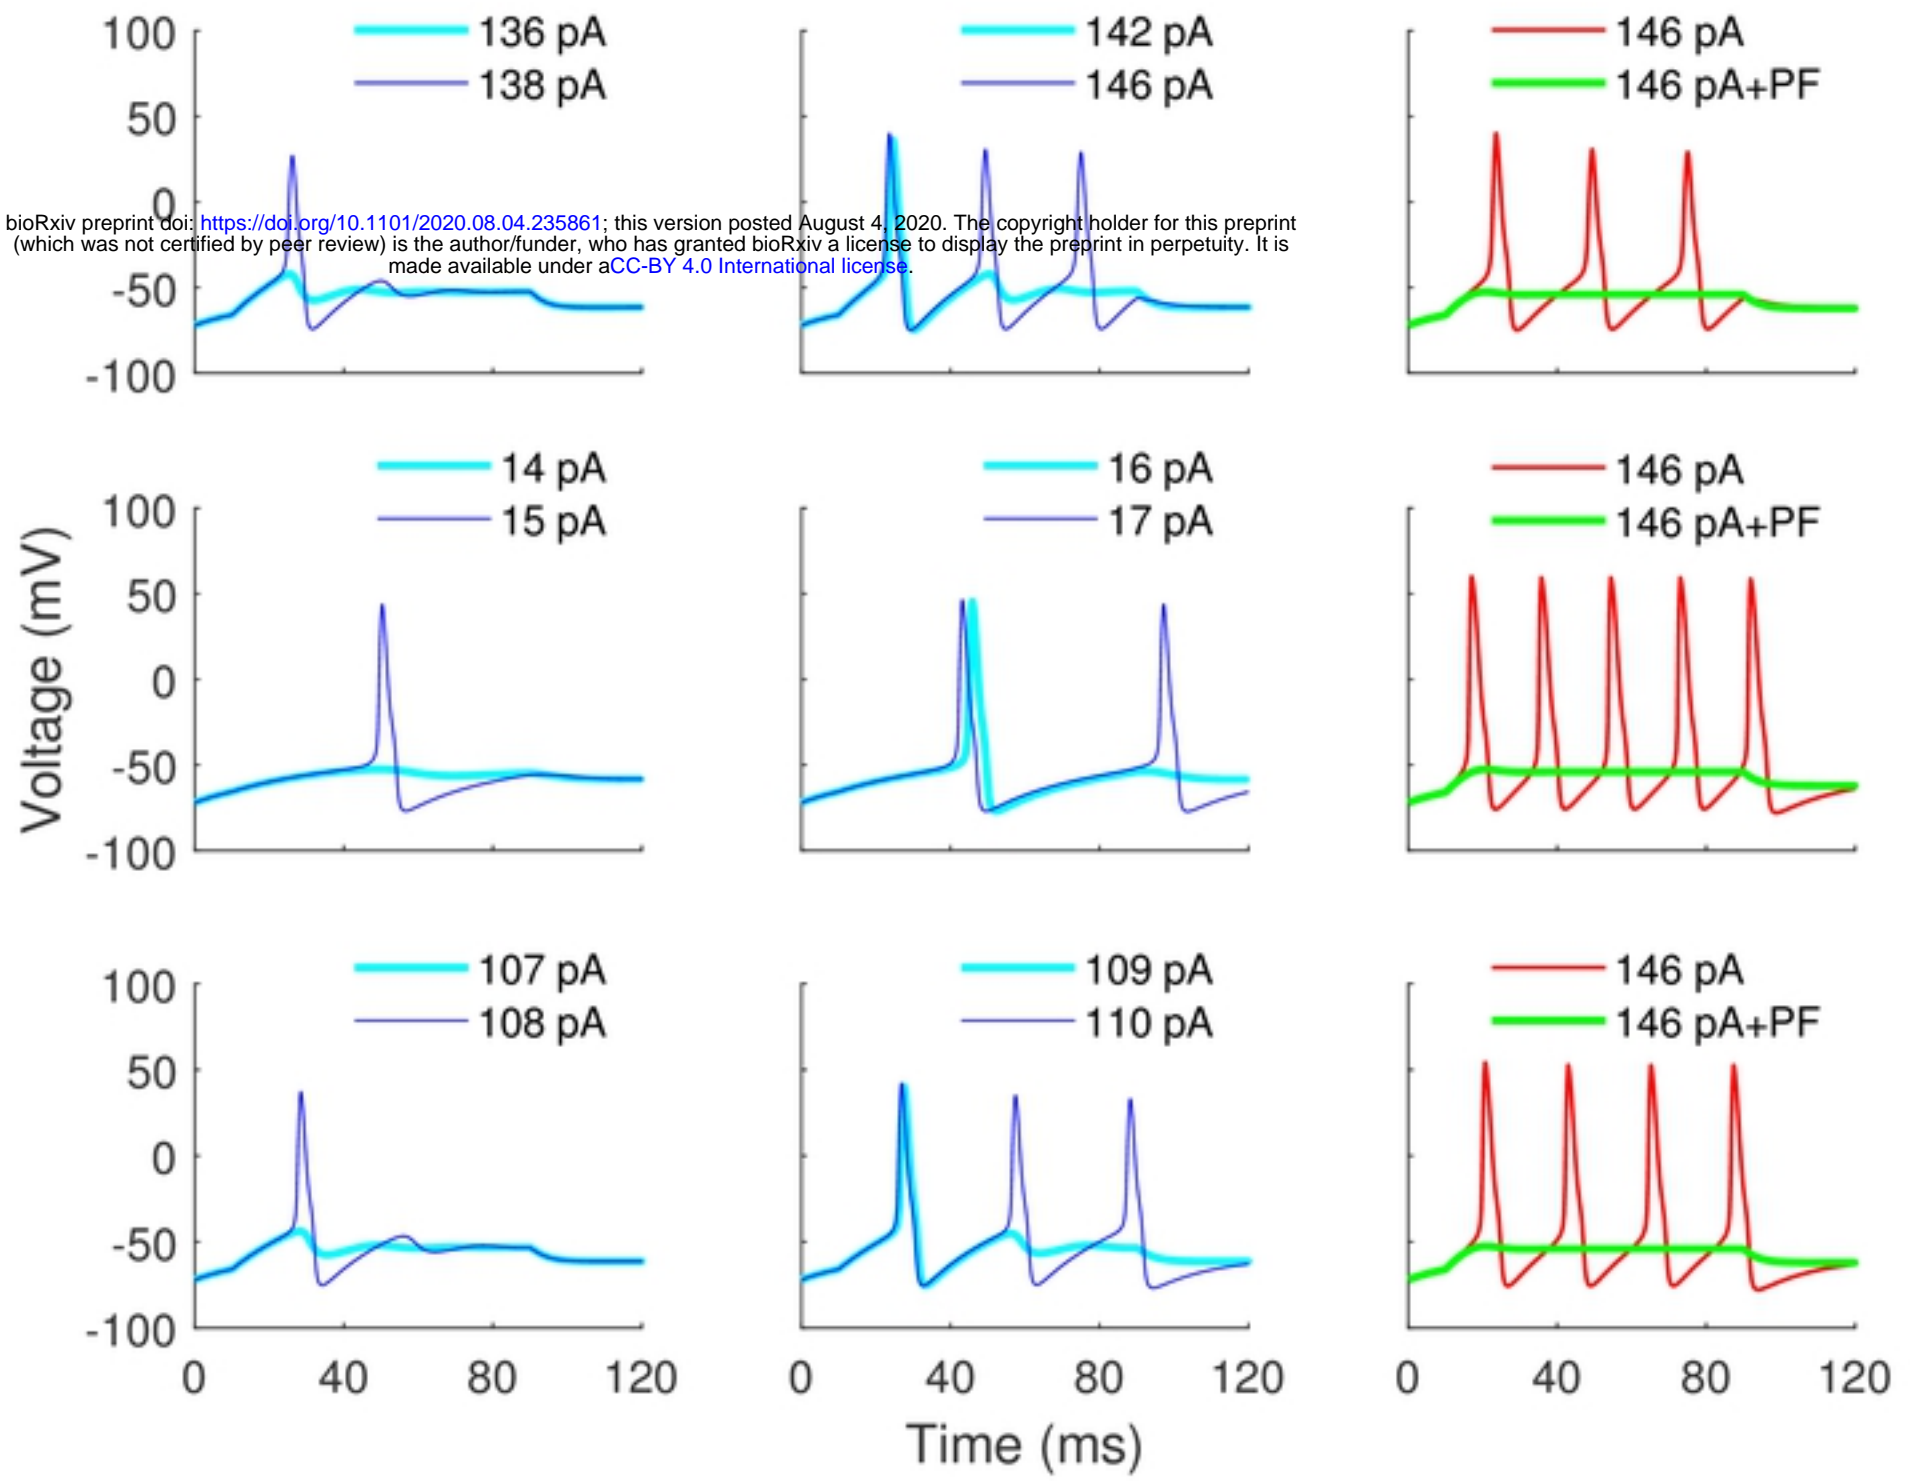

Figure

bioRxiv preprint doi: <https://doi.org/10.1101/2020.08.04.235861>; this version posted August 4, 2020. The copyright holder for this preprint (which was not certified by peer review) is the author/funder, who has granted bioRxiv a license to display the preprint in perpetuity. It is made available under aCC-BY 4.0 International license.

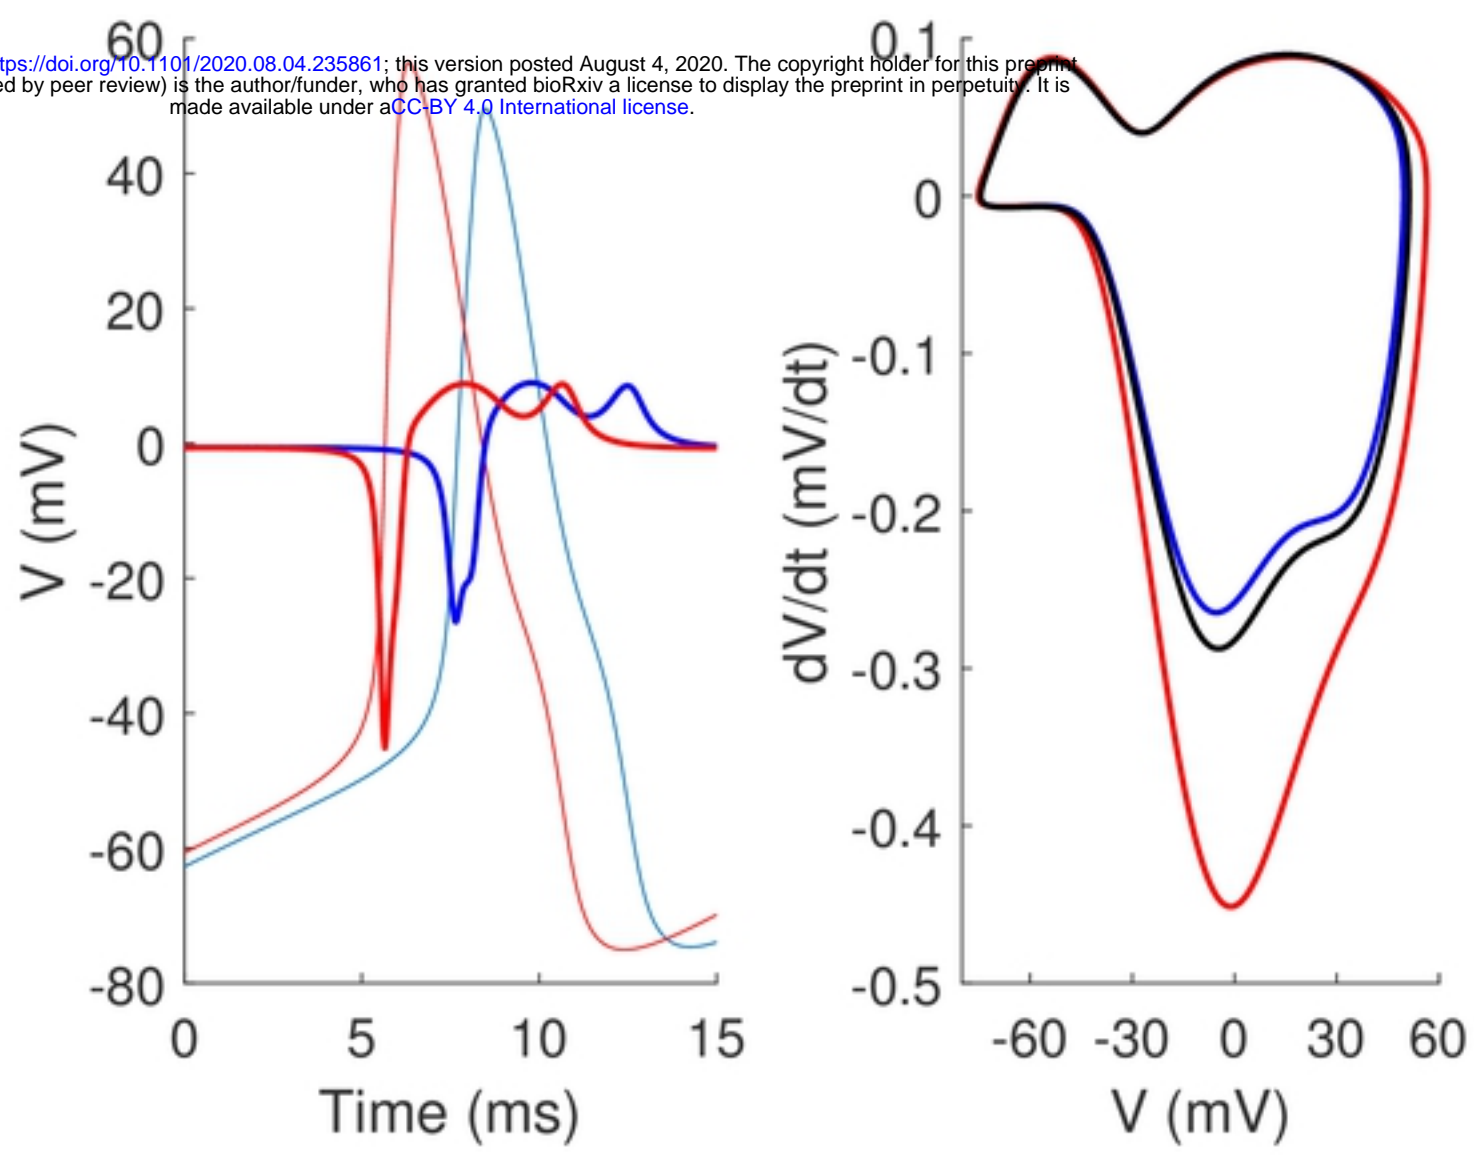

Figure
